# Supplementary material for: Toxicological Responses of α-Pinene-Derived Secondary Organic Aerosol and Its Molecular Tracers in Human Lung Cell Lines
Source: PubMed Central journal article supplement (PMC7967287; doi:10.1021/acs.chemrestox.0c00409), 2021-03-03
Supplement: tx0c00409_si_001.pdf [file tx0c00409_si_001.pdf]

## Supplementary Information

### Toxicological Responses of $\alpha$ -Pinene-Derived Secondary Organic Aerosol and its Molecular Tracers in Human Lung Cell Lines

Faria Khan<sup>†</sup>, Karina Kwapiszewska<sup>†</sup>, Yue Zhang<sup>‡,§</sup>, Yuzhi Chen<sup>‡</sup>, Andrew T. Lambe<sup>§</sup>, Agata Kołodziejczyk<sup>†,||</sup>, Nasir Jalal<sup>⊥</sup>, Krzysztof Rudzinski<sup>†</sup>, Alicia Martínez-Romero<sup>£</sup>, Rebecca C. Fry<sup>‡</sup>, Jason D. Surratt<sup>‡,i\*</sup>, Rafal Szmigielski<sup>†\*\*</sup>

<sup>†</sup> Institute of Physical Chemistry, Polish Academy of Sciences, Kasprzaka 44/52, 01-224 Warsaw, Poland

<sup>‡</sup> Department of Environmental Sciences and Engineering, Gillings School of Global Public Health, University of North Carolina at Chapel Hill, Chapel Hill, North Carolina, United States 27599

<sup>§</sup> Aerodyne Research Inc, Billerica, Massachusetts, United States, 01821

<sup>||</sup> TROPOS ( Leibniz-Institut für Troposphärenforschung, Permoserstrasse 15, 04318 Leipzig, Germany)

<sup>⊥</sup> Department of Interdisciplinary Science, Nanjing University of Information Science & Technology, Nanjing, Jiangsu, China, 210044

<sup>£</sup> Cytomics Core Facility. Príncipe Felipe Research Center. Avda. Eduardo Primo Yúfera, 3, 46012, Valenica, Spain

<sup>i</sup> Department of Chemistry, University of North Carolina at Chapel Hill, Chapel Hill, North Carolina, United States 27599

**Corresponding Authors:**

**RS: \*\* [ralf@ichf.edu.pl](mailto:ralf@ichf.edu.pl) JDS: \* [surratt@unc.edu](mailto:surratt@unc.edu)**

|                     | 24 Hour Treatment | 48 Hour Treatment |
|---------------------|-------------------|-------------------|
| IC <sub>50</sub>    | 912.0             | 230.7             |
| logIC <sub>50</sub> | 2.960             | 2.363             |

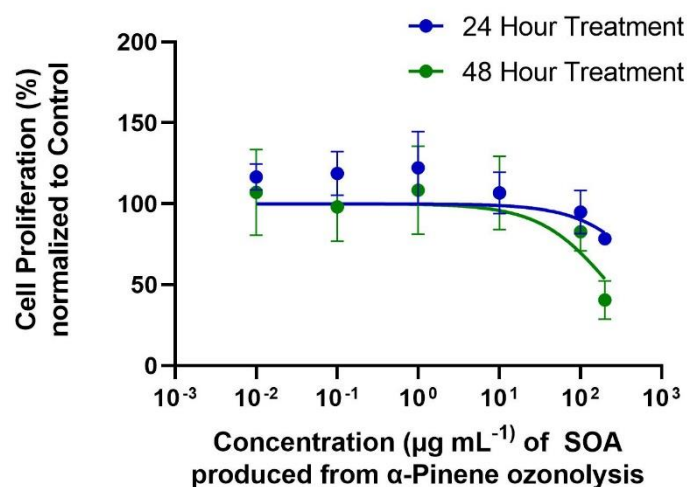

**Figure S1.** Inhibitory concentration-50 (IC<sub>50</sub>) of SOA produced from  $\alpha$ -pinene ozonolysis was found to be 912 and 230  $\mu\text{g mL}^{-1}$  for 48 and 24 hours, respectively. logIC<sub>50</sub> was found to be 2.96 and 2.363 at the two different treatment time points in BEAS-2B cells. IC<sub>50</sub> was calculated using GraphPad Prism (Version 8.00 for Windows, GraphPad Software, La Jolla California USA, [www.graphpad.com](http://www.graphpad.com)).

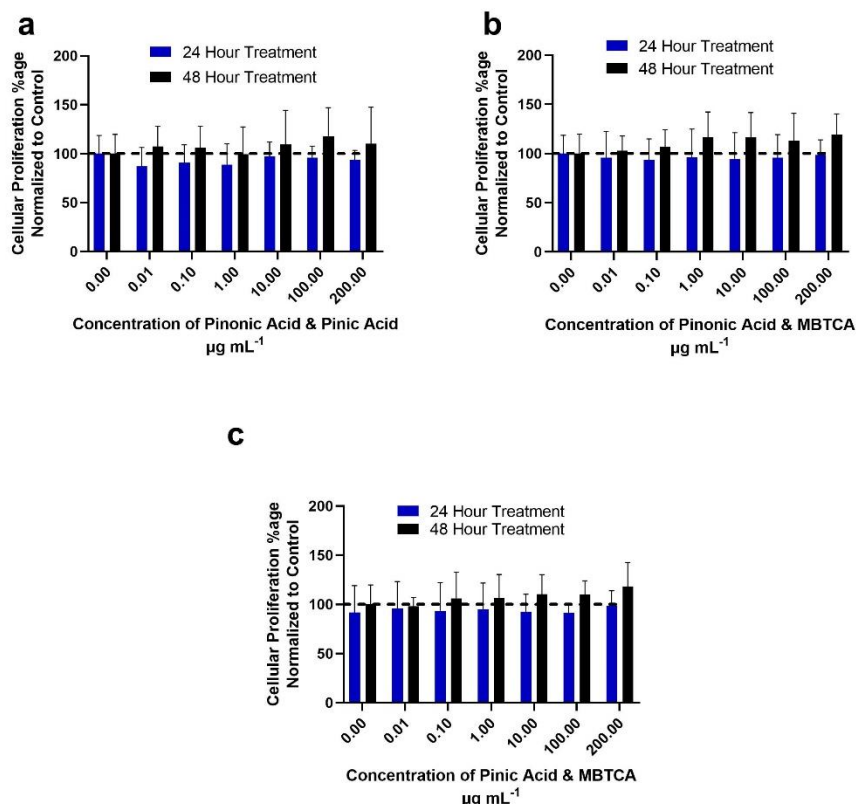

**Figure S2.** The cellular proliferation (in %) for BEAS-2B cells treated with equimolar mixtures of two selected  $\alpha$ -pinene SOA molecular tracers in increasing concentration for 24 (blue bars) and 48 (black bars) hours: (a) pinonic and pinic acids; (b) pinonic acid and MBTCA; and (c) pinic acid and MBTCA.

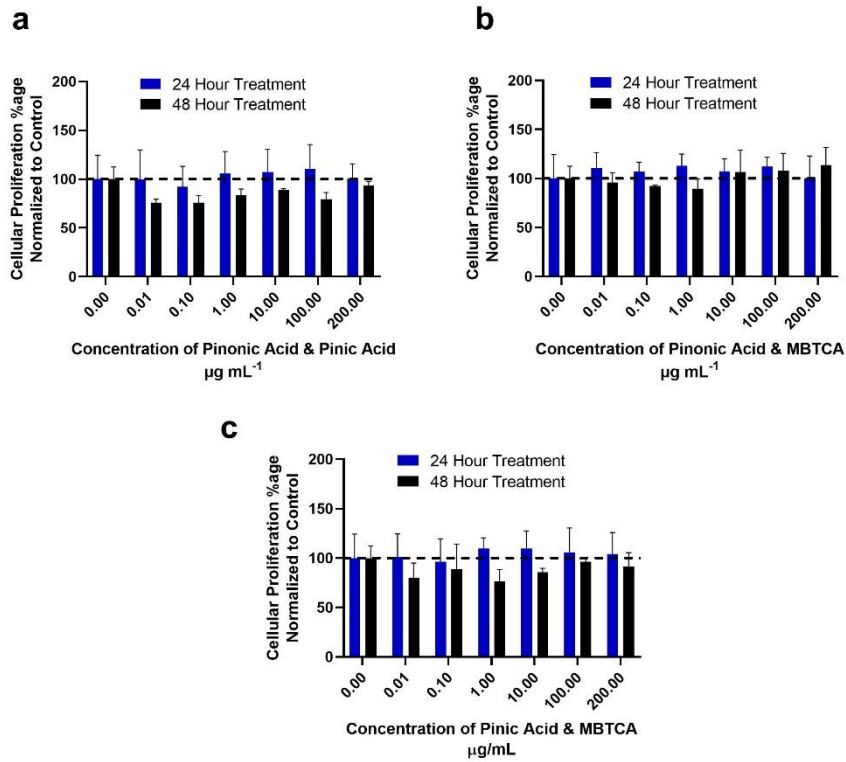

**Figure S3.** The cellular proliferation (in %) of A549 cell lines when treated with equimolar mixtures of two selected  $\alpha$ -pinene SOA molecular tracers in increasing concentration for 24 (blue bars) and 48 (black bars) hours: (a) pinonic and pinic acids; (b) pinonic acid and MBTCA; and (c) pinic acid and MBTCA

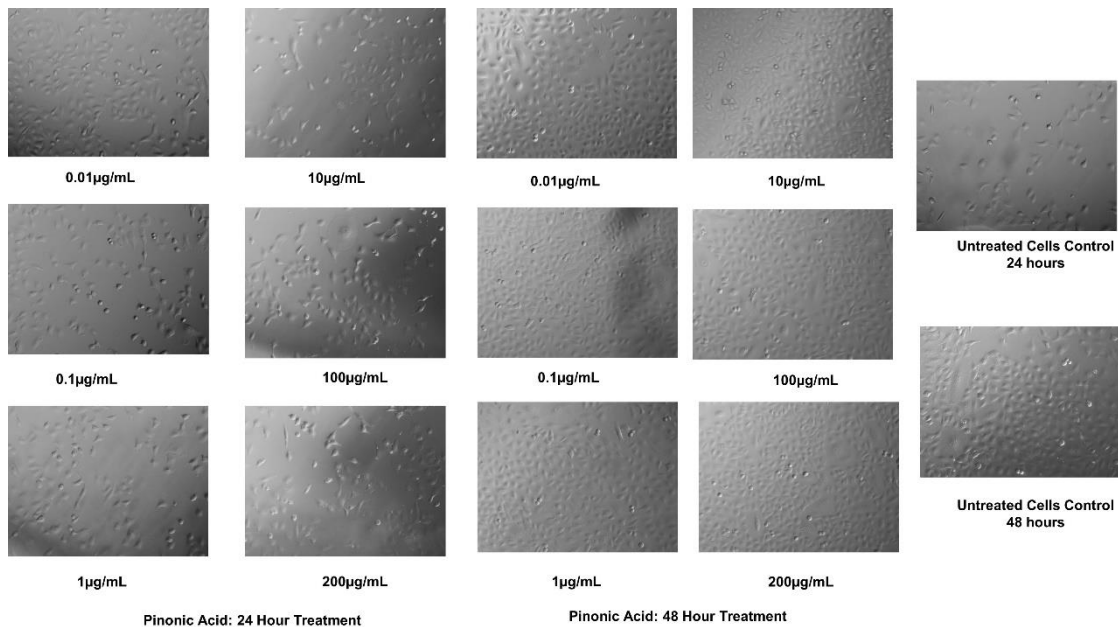

**Figure S4.** Inverted phase microscopy (Nikon Eclipse T1-SAM, Japan) images of A549 cells treated with increasing concentrations of pinonic acid at  $\times 100$  magnification. The micrographs are scaled at  $600 \mu\text{m} \times 800 \mu\text{m}$

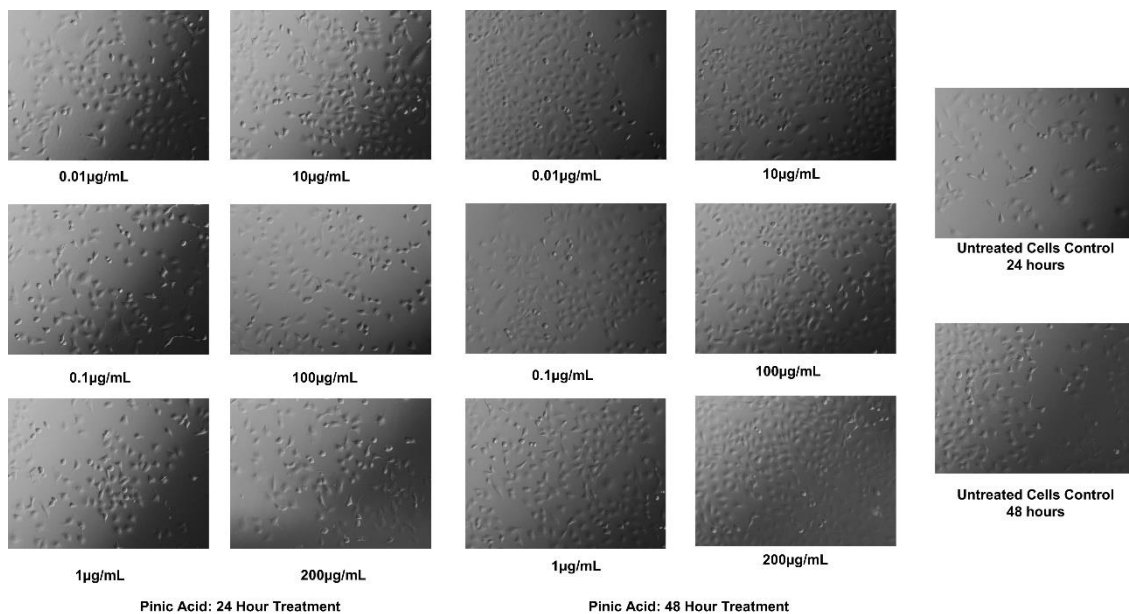

**Figure S5.** Inverted phase microscopy (Nikon Eclipse T1-SAM, Japan) images of A549 cells treated with increasing concentrations of pinic acid at x100 magnification. The micrographs are scaled at 600  $\mu\text{m}$  x 800  $\mu\text{m}$

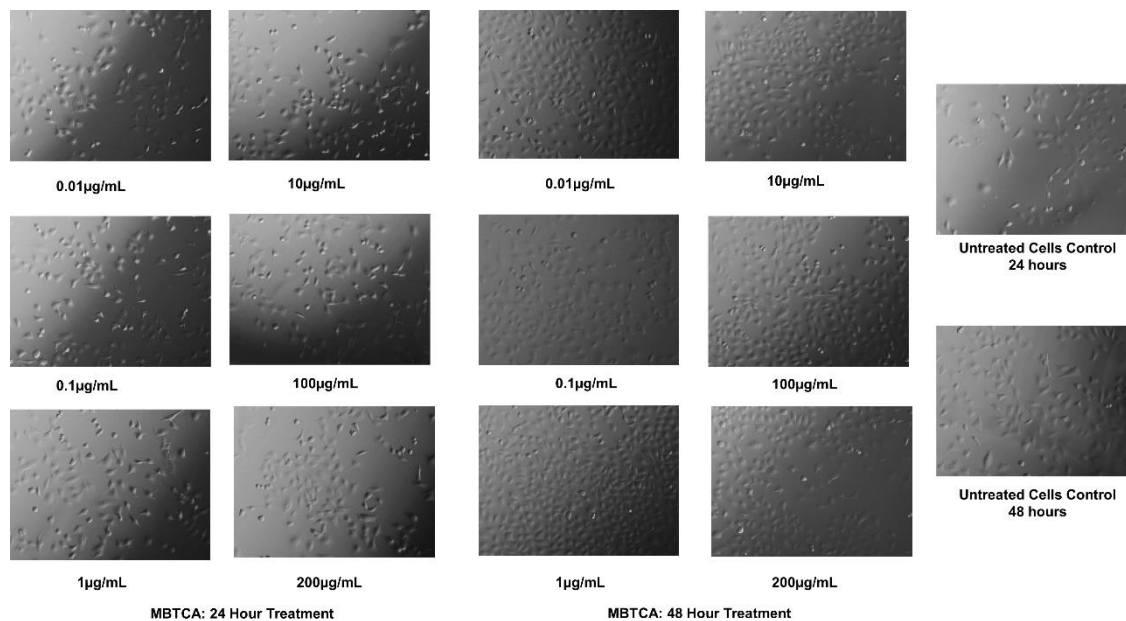

**Figure S6.** Inverted phase microscopy (Nikon Eclipse T1-SAM, Japan) images of A549 cells treated with increasing concentrations of MBTCA at x100 magnification. The micrographs are scaled at 600  $\mu\text{m}$  x 800  $\mu\text{m}$

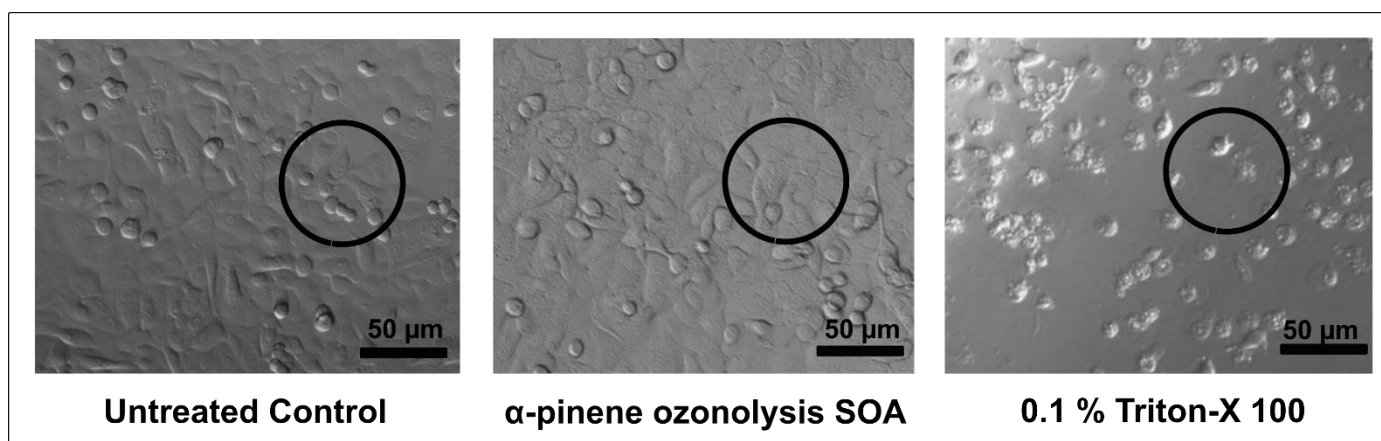

**Figure S7:** The phase contrast microscopy micrograph of A549 cells at 24 hours. The micrographs depict untreated control cells have similar morphology to  $\alpha$ -pinene ozonolysis generated SOA treated A549. The positive control for cytotoxicity (Triton-X 100 treated cells) show visible signs of cellular degradation.

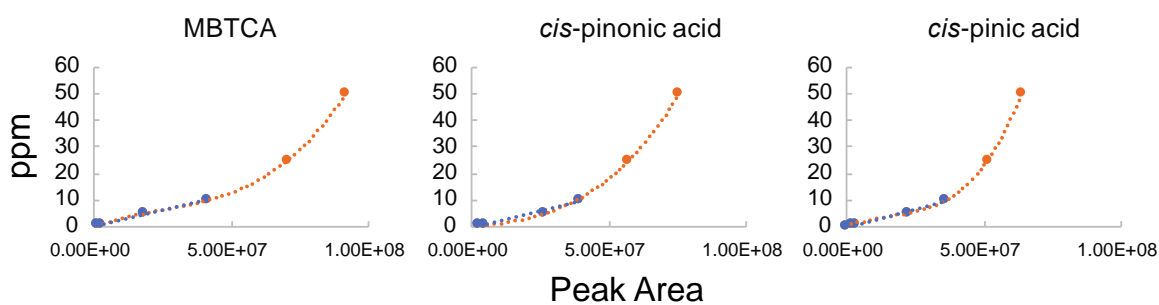

**Figure S8.** Six-point calibration curves for MBTCA, *cis*-pinonic acid and *cis*-pinic acid generated by RPLC/ESI-HR-QTOFMS negative ion mode analysis. Note that the data points within the linear range and the linear fit are shown in blue while the non-linear data points and the polynomial fit are shown in orange.

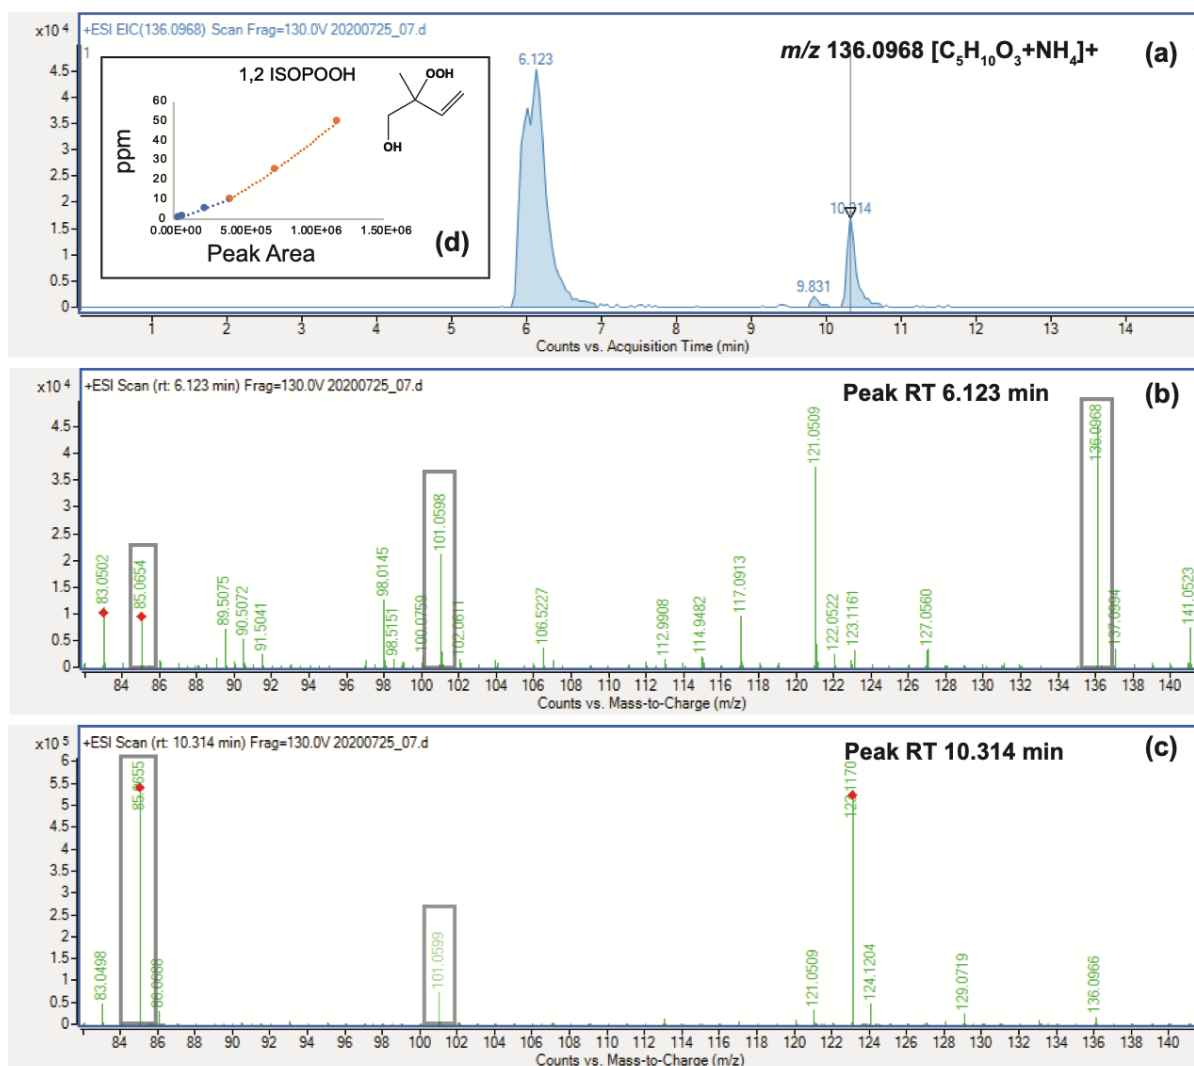

**Figure S9.** RPLC/ESI-HR-QTOFMS positive ion mode analysis of the 1,2-ISOPOOH standard demonstrates how organic hydroperoxides are detected and break down during our ESI-HR-Q-TOFMS analyses: (a) the extracted ion chromatogram (EIC) of  $[M+NH_4]^+$  ion at mass-to-charge ( $m/z$ ) 136 for 1,2-ISOPOOH; (b) the mass spectrum for chromatographic peak with the retention time (RT) of 6.123 min; (c) the mass spectrum for chromatographic peak with the RT of 10.314 min; (d) the six-point calibration curve for 1,2-ISOPOOH in the concentration range between 0.5 and 50 ppm. Consistent with our previous study, the  $[M+H]^+$  molecular ion was not seen in the full MS scan given the -OOH group being a unfavorable protonation site within ESI. Instead, the dehydrated molecular ion  $[M + H - H_2O]^+$  ( $m/z$  101) was observed. The presence of the  $[M+NH_4]^+$  ion resulted from background  $NH_4^+$  contamination in our system. Therefore, the neutral loss of 35 u (i.e.,  $NH_3 + H_2O$  loss from the  $[M+NH_4]^+$  ion) may also contribute to the observed fragment ion at  $m/z$  101. The fragment ion observed at  $m/z$  85 can be explained by the neutral loss of 51 u (i.e.,  $NH_3 + H_2O_2$  loss of the  $[M+NH_4]^+$  ion).

A)

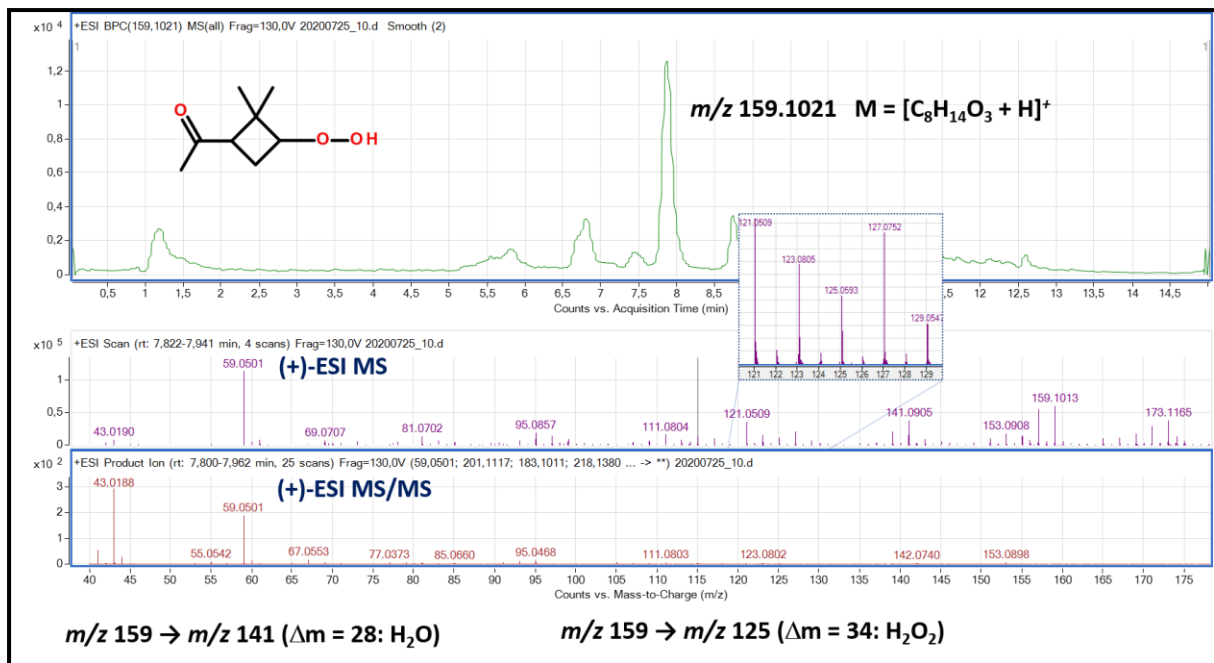

B)

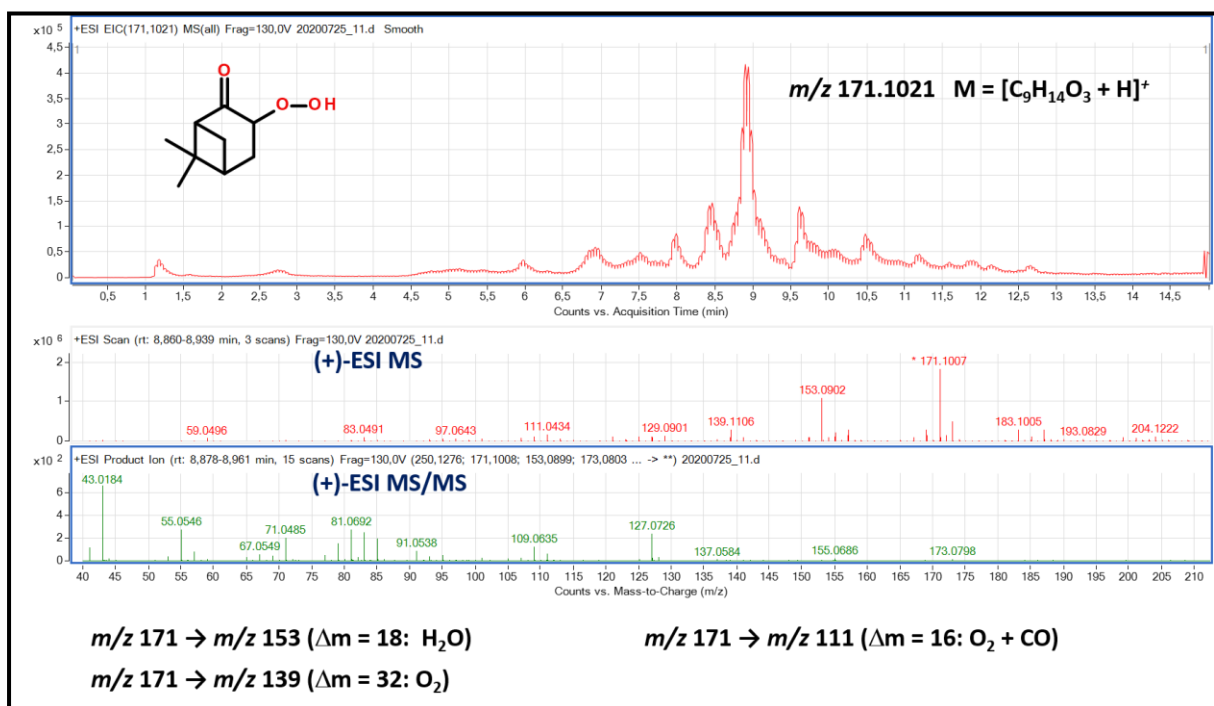



c)

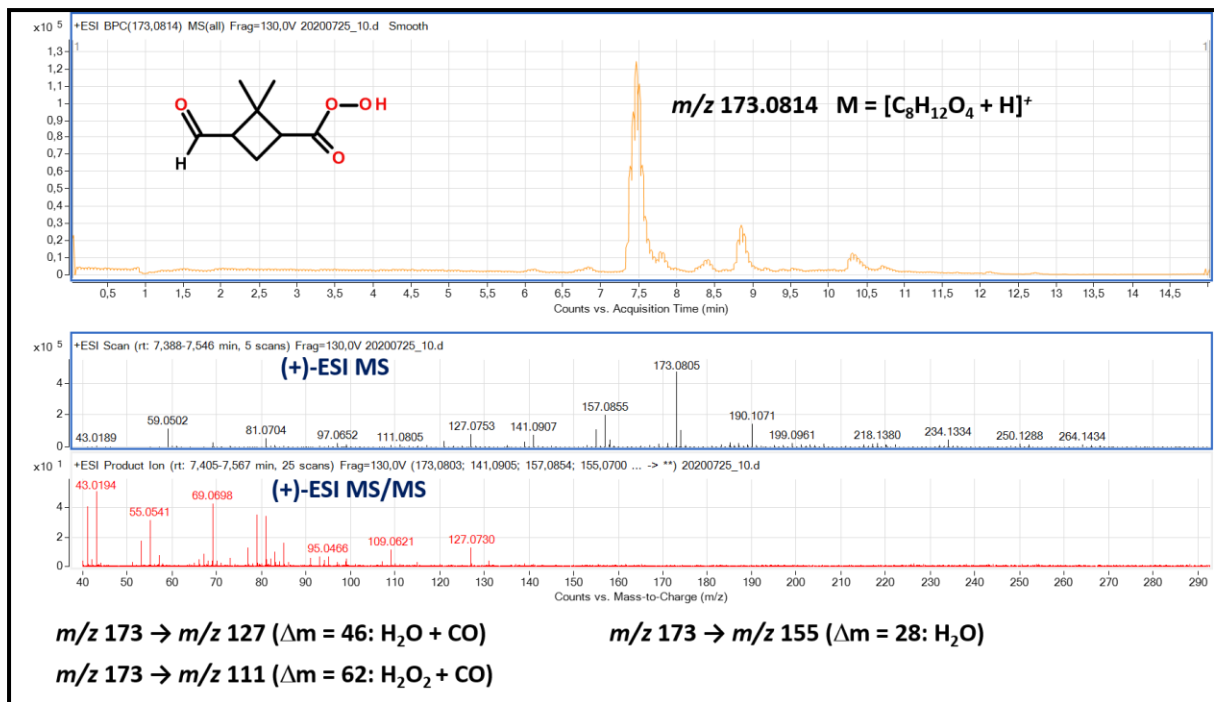

d)

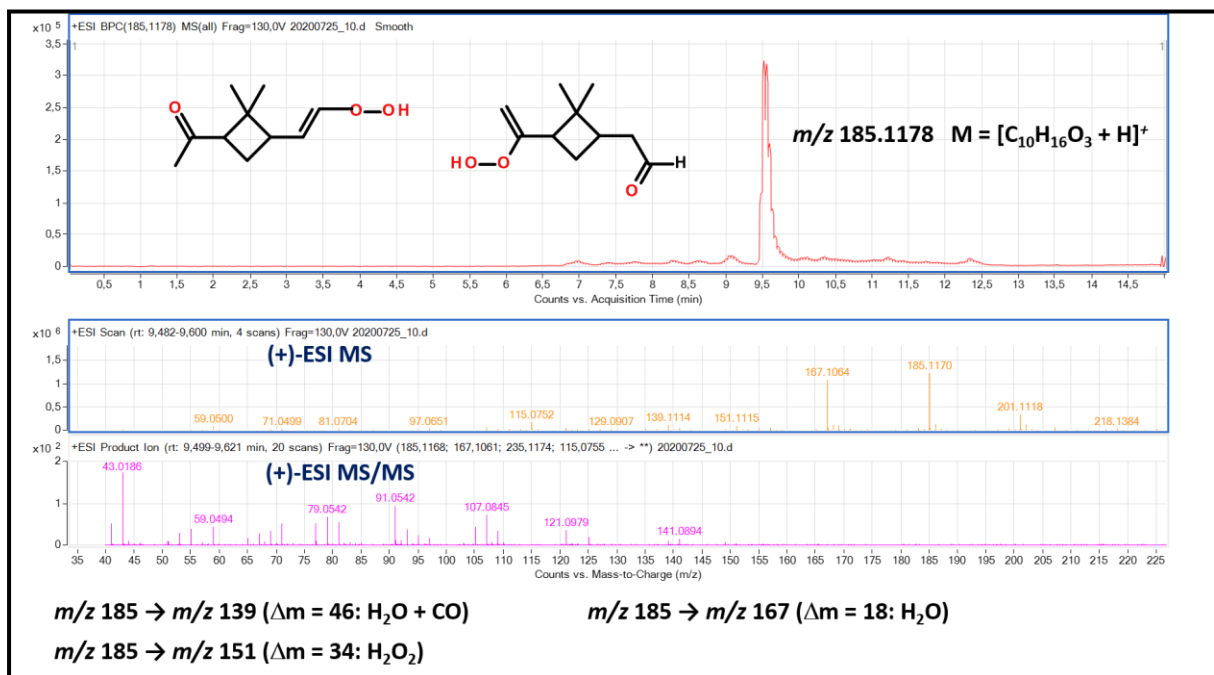



E)

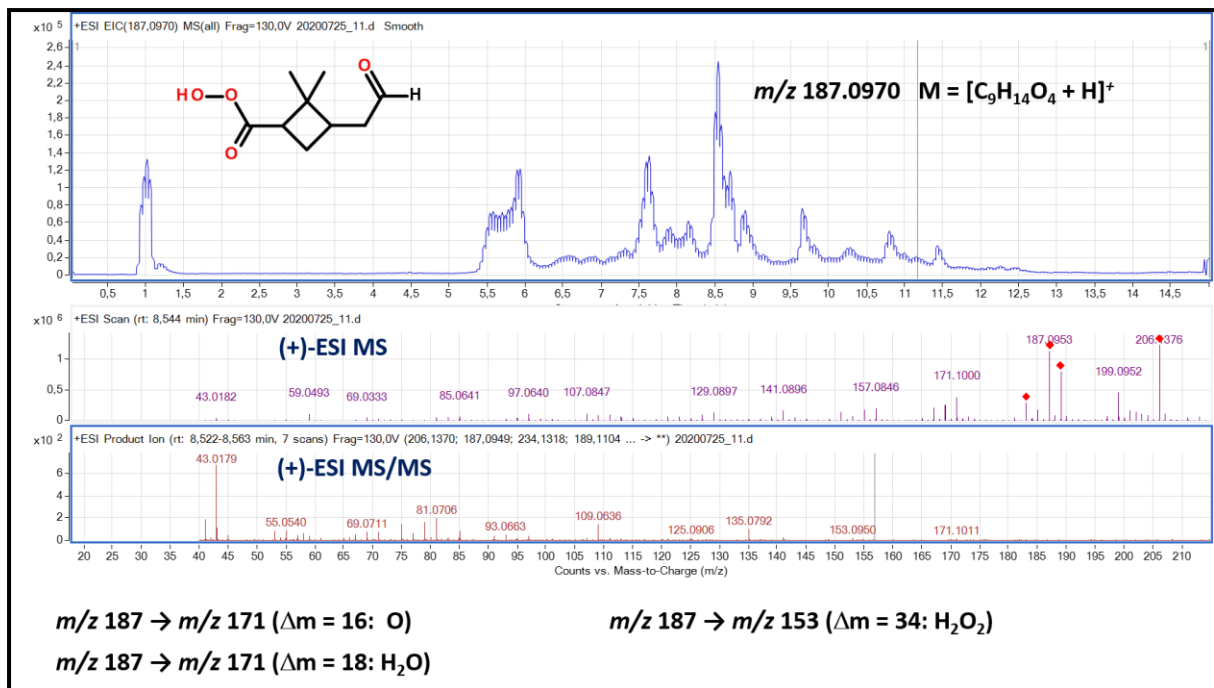

F)

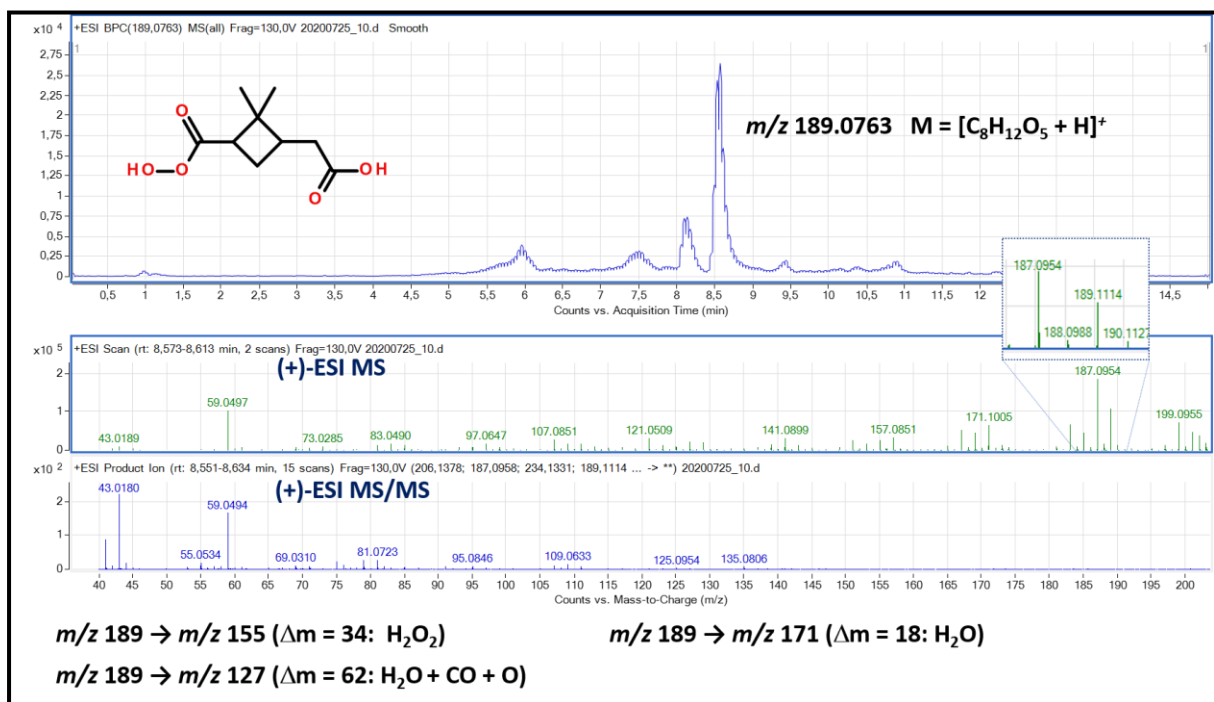

G)

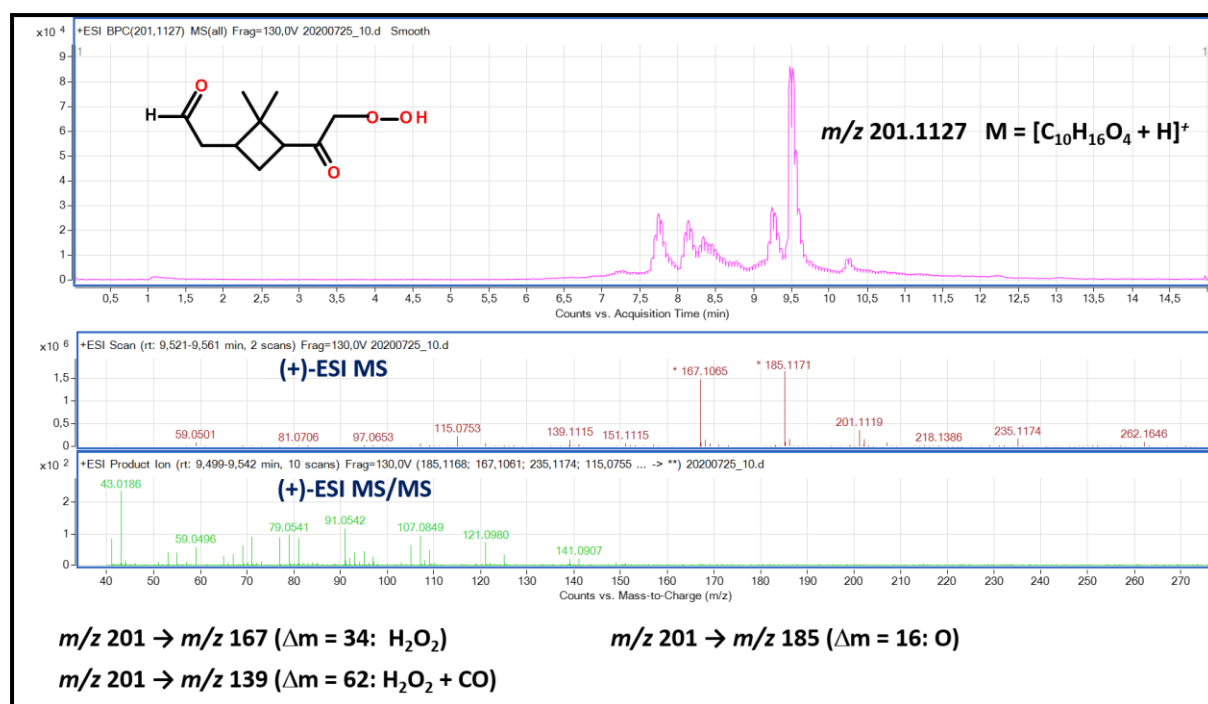

**Figure S10.** RPLC/ESI-HR-QTOFMS positive ion mode analysis data of the PAM-generated SOA from  $\alpha$ -pinene ozonolysis revealed structures of organic hydroperoxides present during the exposures. Seven of these structures were tentatively identified through the accurate mass measurements and tandem mass spectra (MS/MS) spectra (figures A-G). Note that the first panel of each figure shows the extracted ion chromatogram for the  $[M + H]^+$  ion associated with each organic hydroperoxide. The second panel is the positive electrospray mass spectrum for the  $[M + H]^+$  ion and the third panel are the fragment ion mass spectrum (MS/MS) for the  $[M + H]^+$  ion. .

**Table S1.** Comparison of previous toxicological studies associated with  $\alpha$ -pinene SOA with the current study. Note that the fresh  $\alpha$ -pinene SOA is generated through ozonolysis alone, while aged SOA is  $\alpha$ -pinene SOA heterogeneously reacted with OH radicals.

| $\alpha$ -Pinene SOA system studied                                                                | Model used                                             | Response Type Studied                                                                              | Toxicological End Point                                                                                                       | Conclusions                                                                                                                                                                 | Consistent with current Study                  | Reference  |
|----------------------------------------------------------------------------------------------------|--------------------------------------------------------|----------------------------------------------------------------------------------------------------|-------------------------------------------------------------------------------------------------------------------------------|-----------------------------------------------------------------------------------------------------------------------------------------------------------------------------|------------------------------------------------|------------|
| Pinonic Acid<br>Pinic Acid<br>MBTCA<br><br>Fresh $\alpha$ -pinene                                  | A549<br>BEAS-2B                                        | Cytotoxicity<br>Oxidative Stress<br><br>24 & 48 hours<br><br>0.01, 0.1, 1, 10, 100,<br>200ug/mL    | MTT Assay<br><br>Calcein-AM/PI<br>Staining<br><br>H <sub>2</sub> DCFDA                                                        | $\alpha$ -pinene SOA at 200ug/mL<br>induced high time-<br>dependent cell death due to<br>increased ROS                                                                      | N/A                                            | This Study |
| Fresh $\alpha$ -pinene                                                                             | BEAS-2B                                                | Lung Inflammatory<br>response                                                                      | IL-8 and<br>Cytotoxicity                                                                                                      | No significant change in IL-<br>8<br>No toxicity                                                                                                                            | No                                             | 1          |
| $\alpha$ -pinene+<br>NOx+ SOx                                                                      | Macrophages                                            | Lung Macrophage<br>response                                                                        | Cytotoxicity<br>IL-6, IL-8, and<br>TNF- $\alpha$<br>Phagocytic<br>Activity<br>Wound Heal<br>Assay                             | Decreased phagocytic<br>activity                                                                                                                                            | N/A                                            | 2          |
| NOx+ NH <sub>3</sub> $\alpha$ -<br>pinene;<br><br>SOx + NOx+ NH <sub>3</sub> $\alpha$ -<br>pinene; | Apo E <sup>-/-</sup> mice                              | Short term<br>Cardiopulmonary<br>response<br><br>7 days<br><br>250–300 mg/m <sup>3</sup>           | gene expression<br>of<br>TBARS<br>HO-1,<br>ET-1<br>MMP-9                                                                      | SO <sub>2</sub> : Increased expression<br>HO-1, MMP-9, and ET-1<br>No SO <sub>2</sub> : Decreased<br>expression                                                             | N/A                                            | 3          |
| NOx+ $\alpha$ -pinene;<br><br>SOx + NOx+ $\alpha$ -<br>pinene;                                     | Sprague-Dawley<br>rats<br><br>ApoE <sup>-/-</sup> mice | Short term<br>Cardiopulmonary<br>response<br><br>200 $\mu$ g m <sup>-3</sup><br>7 days             | gene expression<br>of TBARS<br>HO-1,<br>ET-1<br>MMP-9                                                                         | Revealed limited biological<br>response                                                                                                                                     | N/A                                            | 4          |
| NOx+ $\alpha$ -pinene<br><br>Fresh and Aged $\alpha$ -<br>pinene                                   | DTT acellular                                          | Oxidative potential<br>response                                                                    | Oxidative stress                                                                                                              | Negligible or no response                                                                                                                                                   | Yes                                            | 5          |
| NOx+ aged $\alpha$ -<br>pinene<br><br>Aged and Fresh $\alpha$ -<br>pinene                          | Murine alveolar<br>macrophages<br>0.1-10ug             | Pro-inflammatory<br>response and<br>oxidative stress<br>response                                   | ROS/RNS<br>production and<br>levels of tumor<br>necrosis factor- $\alpha$<br>(TNF- $\alpha$ ) and<br>interleukin-6 (IL-<br>6) | Similar inflammatory<br>response to all three<br>conditions<br>Negligible or no response                                                                                    | Yes                                            | 6          |
| Fresh & aged $\alpha$ -<br>Pinene SOA                                                              | A549 cells<br>ALI exposure<br>system<br>0-14 $\mu$ g   | Cellular Viability                                                                                 | LDH Assay                                                                                                                     | More decreased viability in<br>aged than fresh sample                                                                                                                       | Yes                                            | 7          |
| Fresh, aged & NOx<br>$\alpha$ -Pinene SOA                                                          | A549 cells<br>ALI exposure<br>system                   | Cellular Viability<br>Oxidative stress<br>Superoxide                                               | WST-1 assay<br>H <sub>2</sub> DCFDA<br>ROS-Superoxide<br>Detection Assay                                                      | No difference between NOx<br>and NOx free system                                                                                                                            | Yes                                            | 8          |
| Fresh $\alpha$ -Pinene<br>SOA                                                                      | BEAS-2B Cell<br>Lines<br>U937 Cell Lines               | Cellular Viability<br>Gene Expression<br>(RT-PCR)<br>0.1, 1, or 10 $\mu$ g/mL<br>3, 6 and 24 hours | GAPDH Ratio to:<br>HMOX<br>IL-8<br><br>ARE Activity                                                                           | No significant change in<br>viability<br>Slightly increased HMOX<br>activity<br>IL-8 increase at 3 hours<br>which is normalized at 24<br>hours<br>No change in ARE activity | Yes-consistent<br>results at<br>similar dosage | 9          |

TBARS: thiobarbituric acid reactive substance, (HO)-1: heme-oxygenase, (ET)-1: endothelin, (MMP)-9: matrix metalloproteinase, (TNF- $\alpha$ ): tumor necrosis factor- $\alpha$ , (IL-6): interleukin-6, (IL-8): interleukin-8 and antioxidant response element (ARE)

## References

1. Jang, M.; Ghio, A. J.; Cao, G., Exposure of BEAS-2B Cells to Secondary Organic Aerosol Coated on Magnetic Nanoparticles. *Chemical Research in Toxicology* **2006**, *19* (8), 1044-1050.
2. Gaschen, A.; Lang, D.; Kalberer, M.; Savi, M.; Geiser, T.; Gazdhar, A.; Lehr, C.-M.; Bur, M.; Dommen, J.; Baltensperger, U.; Geiser, M., Cellular Responses after Exposure of Lung Cell Cultures to Secondary Organic Aerosol Particles. *Environmental Science & Technology* **2010**, *44* (4), 1424-1430.
3. Lund, A. K.; Doyle-Eisele, M.; Lin, Y.-H.; Arashiro, M.; Surratt, J. D.; Holmes, T.; Schilling, K. A.; Seinfeld, J. H.; Rohr, A. C.; Knipping, E. M., The effects of  $\alpha$ -pinene versus toluene-derived secondary organic aerosol exposure on the expression of markers associated with vascular disease. *Inhalation toxicology* **2013**, *25* (6), 309-324.
4. McDonald, J. D.; Doyle-Eisele, M.; Campen, M. J.; Seagrave, J.; Holmes, T.; Lund, A.; Surratt, J. D.; Seinfeld, J. H.; Rohr, A. C.; Knipping, E. M., Cardiopulmonary response to inhalation of biogenic secondary organic aerosol. *Inhalation toxicology* **2010**, *22* (3), 253-265.
5. Tuet, W. Y.; Chen, Y.; Xu, L.; Fok, S.; Gao, D.; Weber, R. J.; Ng, N. L., Chemical oxidative potential of secondary organic aerosol (SOA) generated from the photooxidation of biogenic and anthropogenic volatile organic compounds. *Atmospheric Chemistry & Physics* **2017**, *17*, 839.
6. Tuet, W. Y.; Chen, Y.; Fok, S.; Champion, J. A.; Ng, N. L., Inflammatory responses to secondary organic aerosols (SOA) generated from biogenic and anthropogenic precursors. *Atmospheric Chemistry and Physics* **2017**, *17* (18), 11423.
7. Chowdhury, P. H.; He, Q.; Carmieli, R.; Li, C.; Rudich, Y.; Pardo, M., Connecting the Oxidative Potential of Secondary Organic Aerosols with Reactive Oxygen Species in Exposed Lung Cells. *Environmental Science & Technology* **2019**, *53* (23), 13949-13958.
8. Chowdhury, P. H.; He, Q.; Lasitza Male, T.; Brune, W. H.; Rudich, Y.; Pardo, M., Exposure of Lung Epithelial Cells to Photochemically Aged Secondary Organic Aerosol Shows Increased Toxic Effects. *Environmental Science & Technology Letters* **2018**, *5* (7), 424-430.
9. Ito, T.; Bekki, K.; Fujitani, Y.; Hirano, S., The toxicological analysis of secondary organic aerosol in human lung epithelial cells and macrophages. *Environmental Science and Pollution Research* **2019**, *26* (22), 22747-22755.
